# Supplementary material for: Combination of Copper Metallodendrimers with Conventional Antitumor Drugs to Combat Cancer in In Vitro Models
Source: MDPI journal article supplement (doi:10.3390/ijms24044076), 2023-02-17
Supplement: s1 [file s1]

# Supporting information

## Combination of copper metallodendrimers with conventional antitumor drugs to combat cancer in *in vitro* models

Marcin Hołota <sup>1</sup>, Sylwia Michlewska <sup>1,2\*</sup>, Sandra Garcia-Gallego <sup>3,4,5</sup>, Natalia Sanz del Olmo <sup>3</sup>, Paula Ortega <sup>3,4,5</sup>, Maria Bryszewska<sup>1</sup>, Francisco Javier de la Mata <sup>3,4,5</sup>, Maksim Ionov <sup>1</sup>

Department of General Biophysics, Faculty of Biology & Environmental Protection, University of Lodz, Pomorska 141/143, 90–236 Lodz, Poland

<sup>2</sup> Laboratory of Microscopic Imaging & Specialized Biological Techniques, Faculty of Biology & Environmental Protection, University of Lodz, Banacha12/16, 90–237 Lodz, Poland

<sup>3</sup> Department of Organic and Inorganic Chemistry, Research Institute in Chemistry “Andrés M. del Río” (IQAR), Universidad de Alcalá, 28805 Madrid, Spain

<sup>4</sup> Networking Research Center on Bioengineering, Biomaterials and Nanomedicine (CIBER-BBN), 28029 Madrid, Spain

<sup>5</sup> Institute Ramón y Cajal for Health Research (IRYCIS), 28034 Madrid, Spain

\* Correspondence: sylwia.michlewska@biol.uni.lodz.pl

The copper metallodendrimers with chloride and nitrate ligands were synthesized accordingly with previously published protocol (Sanz Del Olmo, N., Maroto-Díaz, M., Gómez, R., Ortega, P., Cangiotti, M., Ottaviani, M. F., & de la Mata, F. J. (2017). *Carbosilane metallodendrimers based on copper (II) complexes: Synthesis, EPR characterization and anticancer activity. Journal of inorganic biochemistry*, 177, 211–218. <https://doi.org/10.1016/j.jinorgbio.2017.09.023>). Its purity was evaluated by elemental analysis, nuclear magnetic resonance and mass spectrometry techniques.

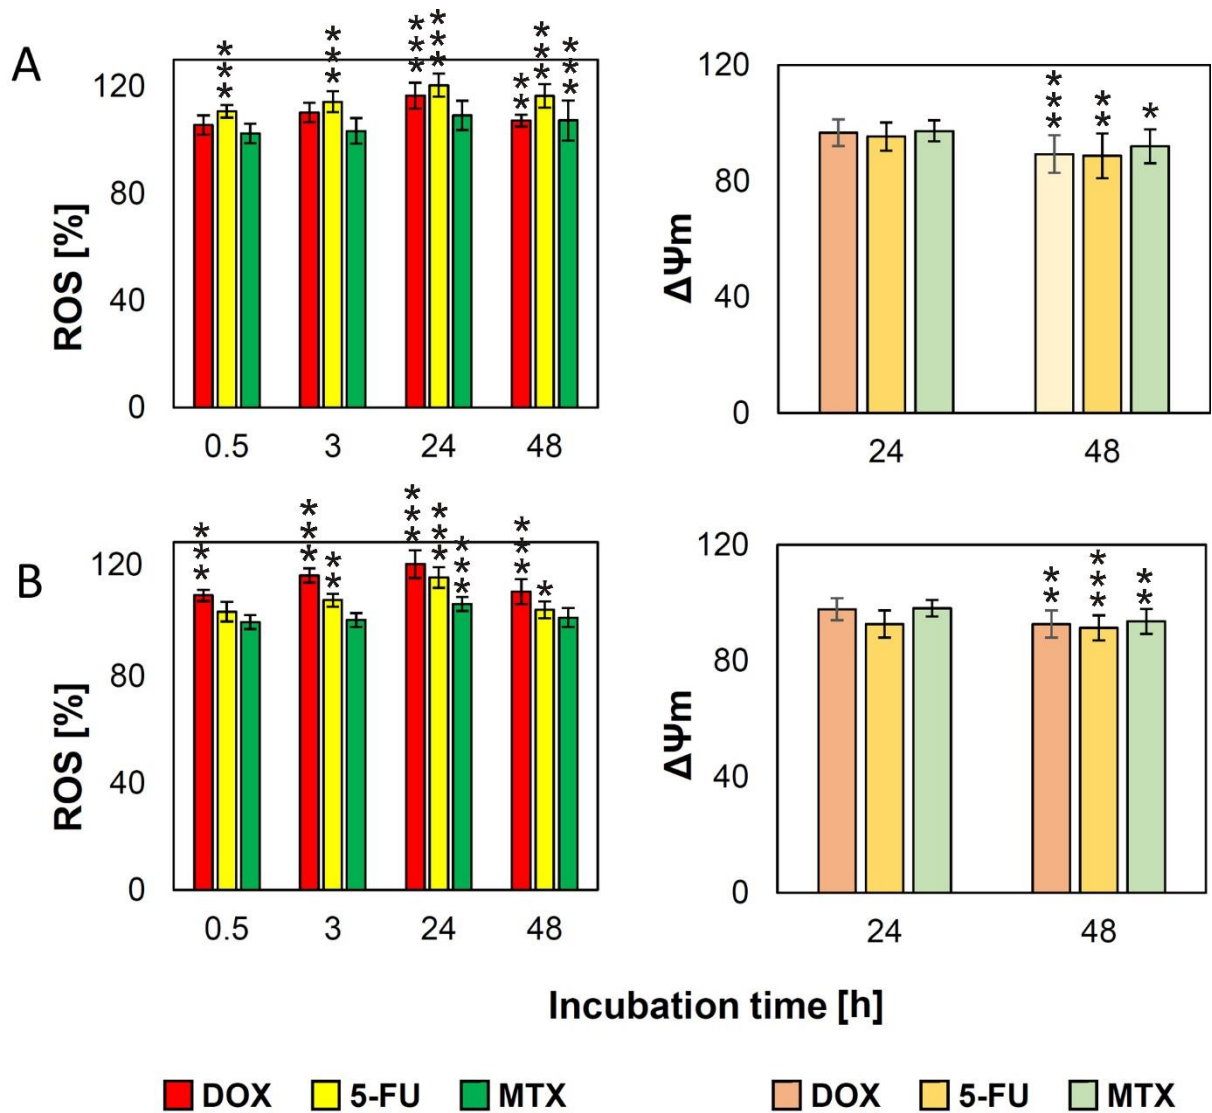

**Figure S1.** Time-dependent ROS production and changes in mitochondrial membrane potential ( $\Psi_m$ ) in MCF7 – (A) or HEP G2 – (B) cells involved by anticancer drugs DOX, 5-Fu and MTX. ROS - fluorescent probe  $H_2DCFDA$ ;  $\Delta\Psi_m$  - fluorescent probe 5,5',6,6'-tetrachloro-1,1',3,3'-tetraethylbenzimidazolylcarbocyanine iodide (JC-1), PBS 10 mmol/L, pH-7.4. Results are means  $\pm$  SD, from a min. of 3 independent experiments. Statistically significant differences vs. control \*p < 0.05, \*\*p < 0.01, \*\*\*p < 0.001.

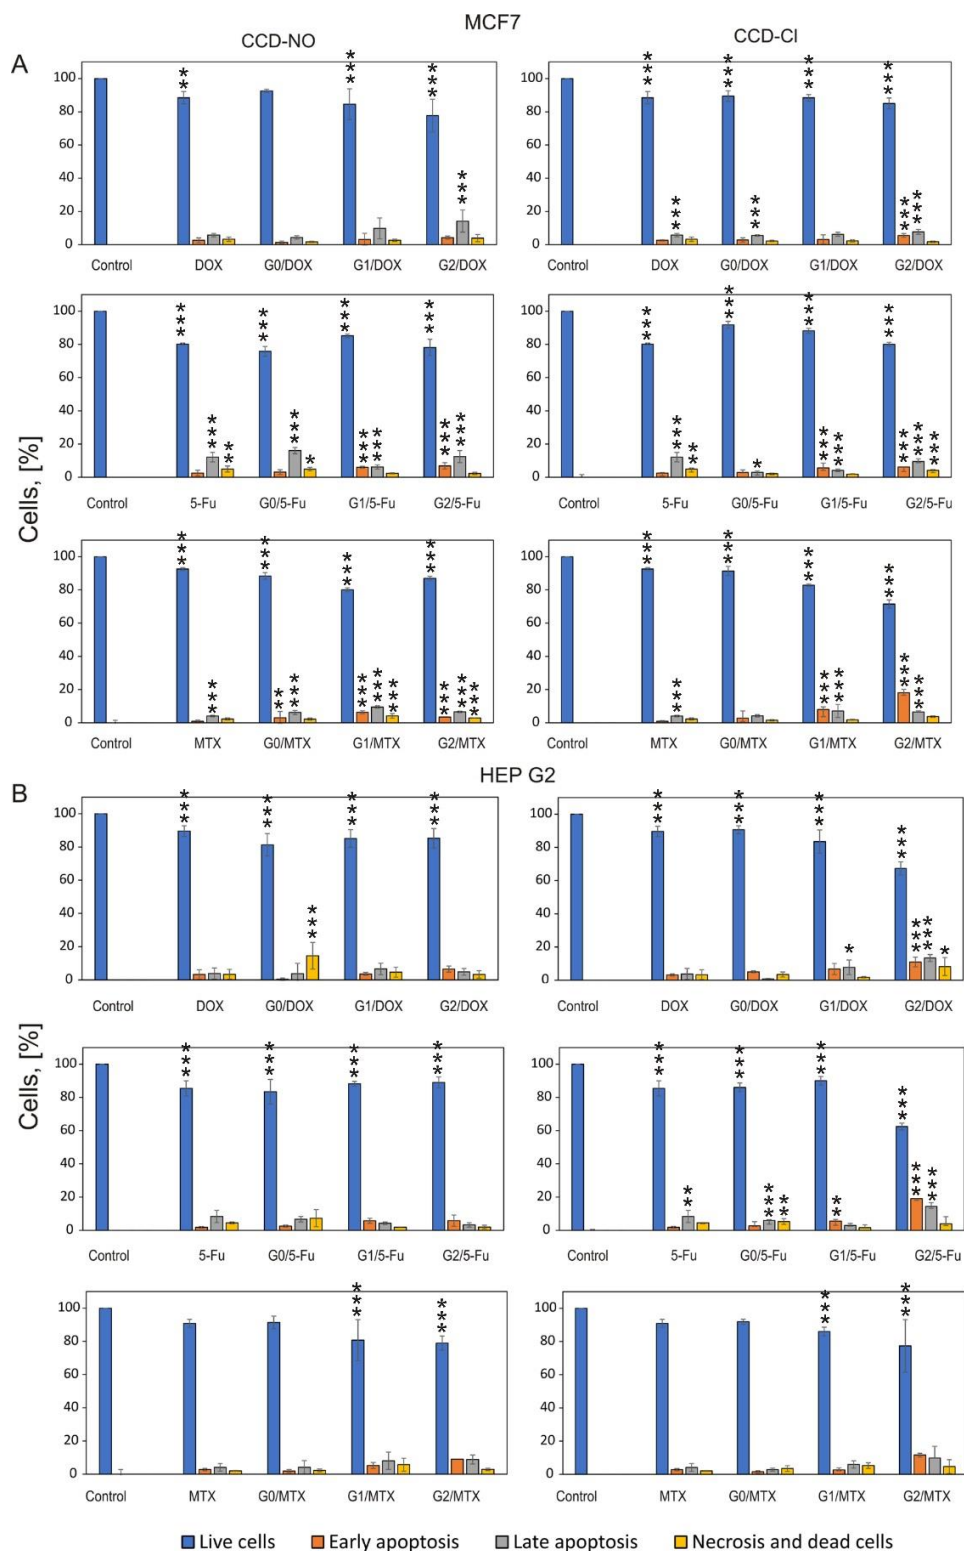

**Figure S2.** The percentages of cells in different phases and apoptosis profile evaluated by flow cytometry and measured using annexin V/propidium iodide staining in PBS 10 mmol/L, pH-7.4. MCF7 – (A) and HEP G2 – (B) cells were interacted with dendrimers, anticancer drugs or dendrimer drug complexes. Incubation time 24 h. The concentrations of drugs were as follows: DOX, 0.1  $\mu\text{mol/L}$  (DOX/Dendrimer molar ratio 1:7); 5-FU, 1  $\mu\text{mol/L}$  (5-FU/Dendrimer molar ratio 1:1); MTX, 2 nmol/L (MTX/Dendrimer molar ratio:

1:32). Results are means  $\pm$  SD, from a min. of 3 independent experiments. Statistically significant differences vs. control \*p < 0.05, \*\*p < 0.01, \*\*\*p < 0.001.
